# Supplementary material for: Molecular Diagnosis of Human Monkeypox Virus during 2022–23 Outbreak: Preliminary Evaluation of Novel Real-Time Qualitative PCR Assays
Source: MDPI journal article supplement (doi:10.3390/microorganisms12040664), 2024-03-27
Supplement: s1 [file s1]

## Supplemental material

**Table S1:** *Detection of MPXV DNA using four RUO molecular assays.* Positive results were reported as Ct. Abbreviations: Novaplex (Novaplex MPXV Assay); M10 (STANDARD M10 MPX/OPX); RealCycler (RealCycler MONK-UX / MONK-GX v.2); RealStar (RealStar Orthopoxvirus PCR Kit 1.0); weakly positive (+); positive (++) . Results with different interpretation from reference molecular procedure were reported in bold red.

| Sample ID | Specimen Type           | Collection date | Real-time PCR assays of MPXV |              |                 |                 |              |
|-----------|-------------------------|-----------------|------------------------------|--------------|-----------------|-----------------|--------------|
|           |                         |                 | In-house                     | Novaplex     | M10             | RealCycler      | RealStar     |
| 1         | Rectal swab             | 08/07/2022      | 20 ++                        | 17 ++        | 19 ++           | 15 ++           | 18 ++        |
| 2         | Hand pustule            | 08/07/2022      | 23 ++                        | 20 ++        | 25 ++           | 16 ++           | 22 ++        |
| 3         | Genital lesion          | 11/07/2022      | 18 ++                        | 14 ++        | 18 ++           | 11 ++           | 16 ++        |
| 4         | Anal lesion             | 11/07/2022      | 20 ++                        | 17 ++        | 18 ++           | 13 ++           | 18 ++        |
| 5         | Vesicle (not specified) | 11/07/2022      | Negative                     | Negative     | Negative        | Negative        | Negative     |
| 6         | Penis lesion            | 12/07/2022      | 24 ++                        | 19 ++        | 21 ++           | 17 ++           | 22 ++        |
| 7         | Penis lesion            | 12/07/2022      | 22 ++                        | 16 ++        | 19 ++           | 14 ++           | 20 ++        |
| 8         | Genital lesion          | 13/07/2022      | 22 ++                        | 19 ++        | 20 ++           | 15 ++           | 18 ++        |
| 9         | Genital lesion          | 13/07/2022      | 38 +                         | 37 +         | 34 +            | <b>30 ++</b>    | 34 +         |
| 10        | Glans lesion            | 15/07/2022      | 29 ++                        | 22 ++        | 24 ++           | 16 ++           | 22 ++        |
| 11        | Penis lesion            | 15/07/2022      | 28 ++                        | 19 ++        | 22 ++           | 14 ++           | 20 ++        |
| 12        | Anal lesion             | 15/07/2022      | 25 ++                        | 19 ++        | 20 ++           | 14 ++           | 22 ++        |
| 13        | Back lesion             | 15/07/2022      | 34 +                         | 32 +         | 32 +            | <b>26 ++</b>    | 32 +         |
| 14        | Lesion (not specified)  | 15/07/2022      | 28 ++                        | 23 ++        | 27 ++           | 20 ++           | 25 ++        |
| 15        | Lesion (not specified)  | 15/07/2022      | 28 ++                        | 23 ++        | 26 ++           | 19 ++           | 24 ++        |
| 16        | Lesion (not specified)  | 15/07/2022      | 28 ++                        | 18 ++        | 22 ++           | 14 ++           | 20 ++        |
| 17        | Foreskin lesion         | 18/07/2022      | Negative                     | Negative     | Negative        | Negative        | Negative     |
| 18        | Anal lesion             | 18/07/2022      | Negative                     | Negative     | Negative        | Negative        | Negative     |
| 19        | Foreskin lesion         | 18/07/2022      | Negative                     | Negative     | Negative        | Negative        | Negative     |
| 20        | Vesicle (not specified) | 19/07/2022      | Negative                     | Negative     | Negative        | Negative        | Negative     |
| 21        | Vesicle (not specified) | 20/07/2022      | Negative                     | Negative     | Negative        | Negative        | Negative     |
| 22        | Vesicle (not specified) | 22/07/2022      | Negative                     | Negative     | Negative        | Negative        | Negative     |
| 23        | Vesicle (not specified) | 25/07/2022      | Negative                     | Negative     | Negative        | Negative        | Negative     |
| 24        | Vesicle (not specified) | 26/07/2022      | Negative                     | Negative     | Negative        | Negative        | Negative     |
| 25        | Pustule (not specified) | 26/07/2022      | Negative                     | Negative     | Negative        | Negative        | Negative     |
| 26        | Lesion (not specified)  | 29/07/2022      | 25 ++                        | 20 ++        | 23 ++           | 15 ++           | 20 ++        |
| 27        | Lesion (not specified)  | 29/07/2022      | 23 ++                        | 20 ++        | 22 ++           | 14 ++           | 20 ++        |
| 28        | Lesion (not specified)  | 29/07/2022      | 23 ++                        | 21 ++        | 23 ++           | 16 ++           | 22 ++        |
| 29        | Lesion (not specified)  | 29/07/2022      | 31 +                         | <b>25 ++</b> | <b>26 ++</b>    | <b>21 ++</b>    | <b>26 ++</b> |
| 30        | Anal lesion             | 02/08/2022      | 38 +                         | 38 +         | 35 +            | <b>29 ++</b>    | 34 +         |
| 31        | Lesion (not specified)  | 02/08/2022      | 36 +                         | 34 +         | 33 +            | <b>27 ++</b>    | 32 +         |
| 32        | Skin lesion             | 03/08/2022      | 32 +                         | <b>25 ++</b> | <b>26 ++</b>    | <b>20 ++</b>    | <b>26 ++</b> |
| 33        | Lesion (not specified)  | 03/08/2022      | 35 +                         | 33 +         | 33 +            | <b>27 ++</b>    | 31 +         |
| 34        | Anal lesion             | 05/08/2022      | 25 ++                        | 23 ++        | 25 ++           | 18 ++           | 22 ++        |
| 35        | Rectal swab             | 05/08/2022      | 18 ++                        | 15 ++        | 15 ++           | 11 ++           | 14 ++        |
| 36        | Anal lesion             | 05/08/2022      | 36 +                         | 37 +         | <b>Negative</b> | <b>Negative</b> | 36 +         |
| 37        | Rectal swab             | 08/07/2022      | 20 ++                        | 17 ++        | 19 ++           | 15 ++           | 18 ++        |
